# Supplementary material
Source: PubMed Central journal article supplement (PMC5488733)

## Supplemental Material

**eFigure.** Directed acyclic graph of hypothesized relationships between variables included in analysis. L1 indicates individual-level factors: age at delivery, race/ethnicity, primary care patient status, smoking status, pre-pregnancy body mass index, parity, receipt of Medical Assistance, delivery hospital, antibiotic orders during pregnancy, year and season of birth, sex and gestational age of neonate; L2, community factors: community socioeconomic deprivation, drinking water source; L3, distance to nearest major road, residential greenness; UNGD, unconventional natural gas development; chemical hazards include toxicity, irritation, and odors, via air, soil, and water; physical hazards include noise, light, and vibration; social disruption includes changes in social relationships and socioeconomic status, increased traffic, and fear and anxiety related to environmental change.

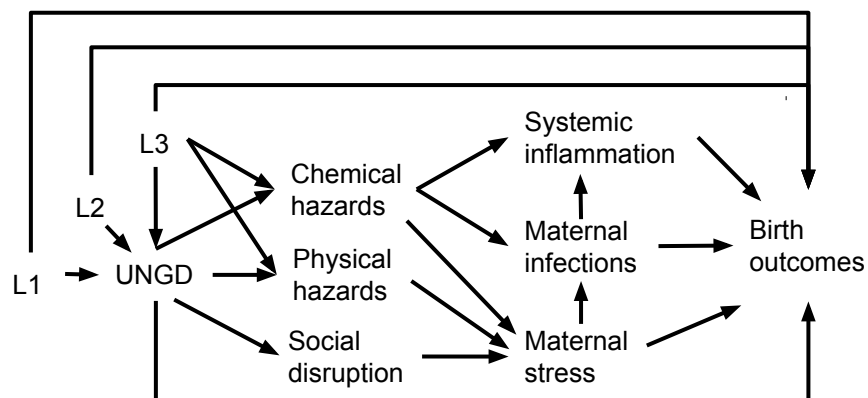

Supplement: NIHMS867002-supplement-eFigure.pdf [file NIHMS867002-supplement-eFigure.pdf]
